# Supplementary material for: Microbial fuel cell assisted band gap narrowed TiO2 for visible light-induced photocatalytic activities and power generation
Source: PubMed Central journal article supplement (PMC5788852; doi:10.1038/s41598-018-19617-2), 2018-01-29
Supplement: 41598_2018_19617_MOESM1_ESM.pdf [file 41598_2018_19617_MOESM1_ESM.pdf]

## Supplementary Information

### Microbial fuel cell assisted band gap narrowed $\text{TiO}_2$ for visible light-induced activities and power generation

Mohammad Ehtisham Khan<sup>1</sup>, Mohammad Mansoob Khan<sup>2\*</sup>, Bong-Ki Min<sup>3</sup>, and Moo Hwan Cho<sup>1\*</sup>

<sup>1</sup>School of Chemical Engineering, Yeungnam University, Gyeongsan-si, Gyeongbuk 38541, South Korea.

<sup>2</sup>Chemical Sciences, Faculty of Science, Universiti Brunei Darussalam, Jalan Tungku Link, Gadong, BE 1410, Brunei Darussalam.

<sup>3</sup>Materials Science Centre, Yeungnam University, Gyeongsan-si, Gyeongbuk 38541, South Korea.

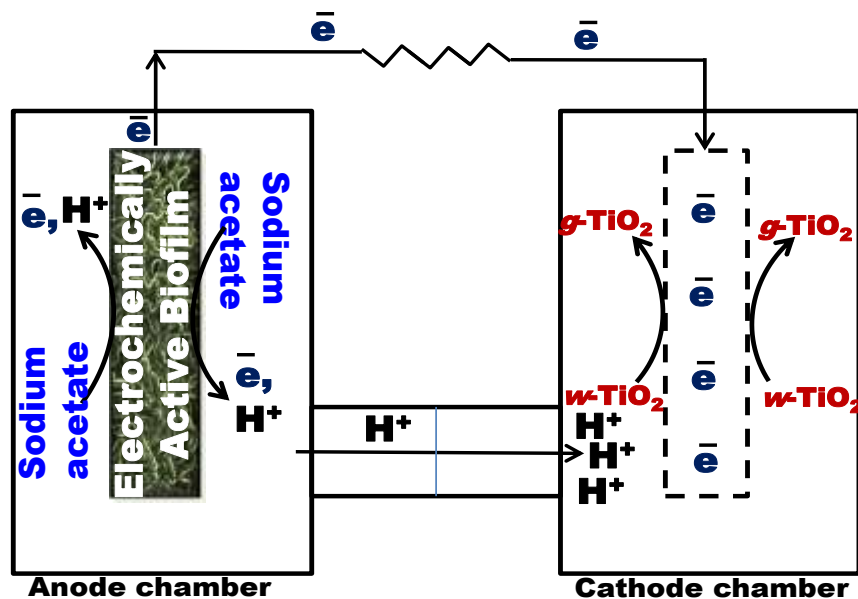

Fig. S1 Proposed schematic model for modification of the  $\text{TiO}_2$  in MFC.

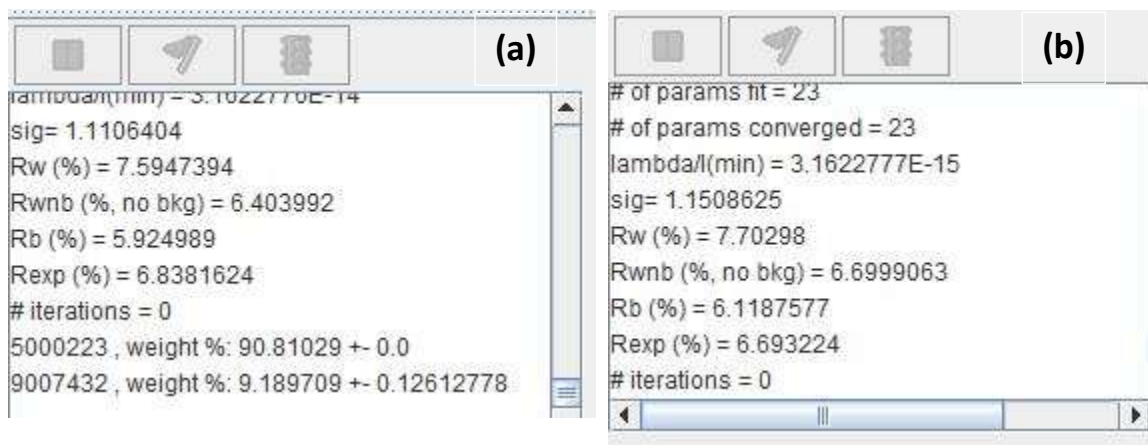

Fig. S2 Rietveld refinement indices for (a) *w*-TiO<sub>2</sub>, and (a) *g*-TiO<sub>2</sub> nanoparticles.

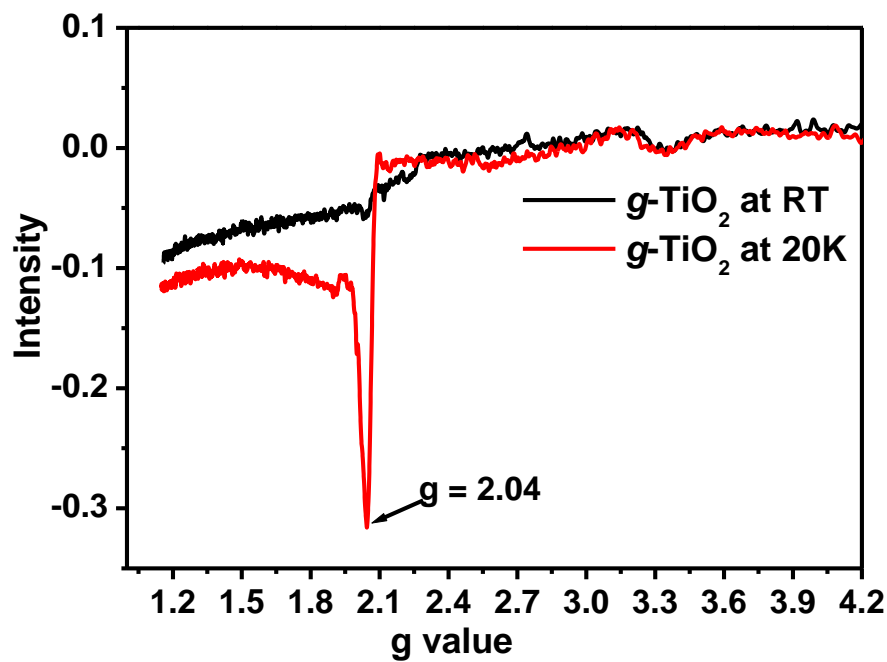

Fig. S3 g value of the *w*-TiO<sub>2</sub> and *g*-TiO<sub>2</sub> nanoparticles at RT and 20 K.

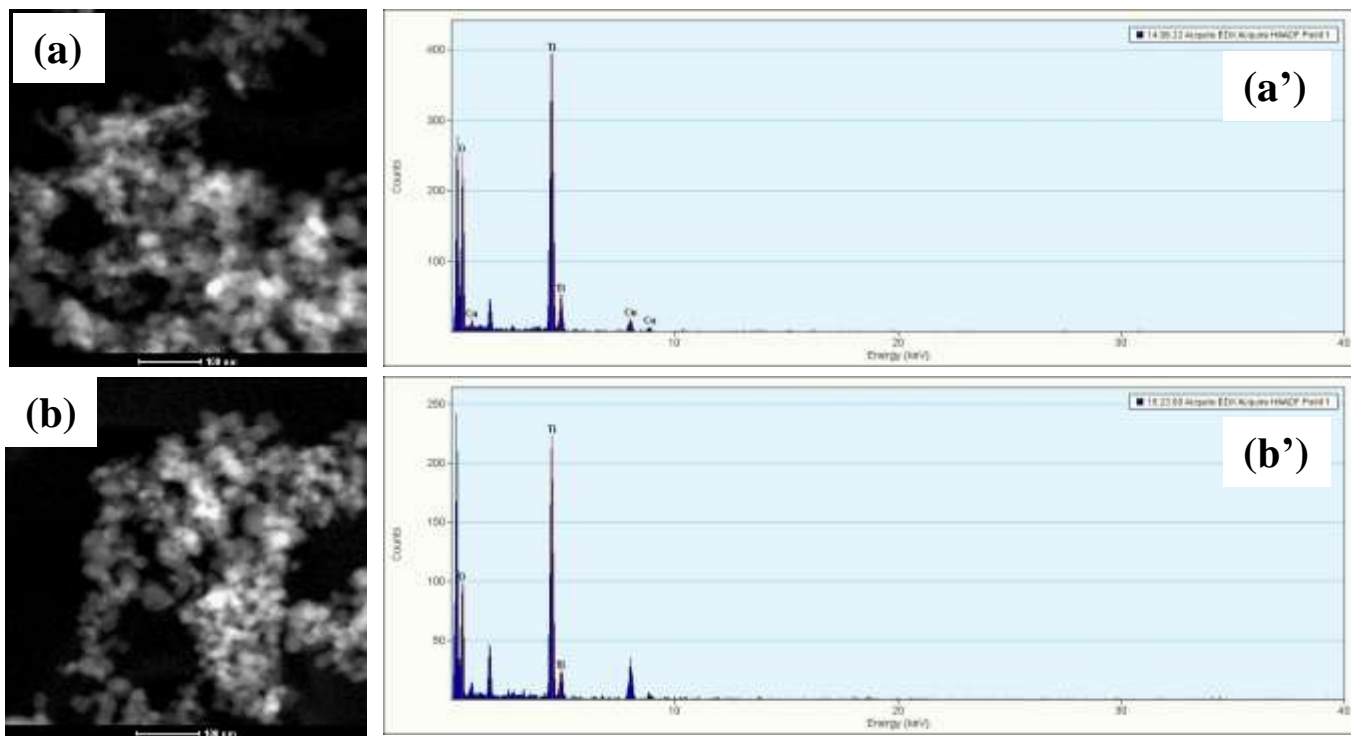

**Fig. S4** Acquire HAADF (a and b) and EDX (a' and b') of *w*-TiO<sub>2</sub> and *g*-TiO<sub>2</sub> nanoparticles.

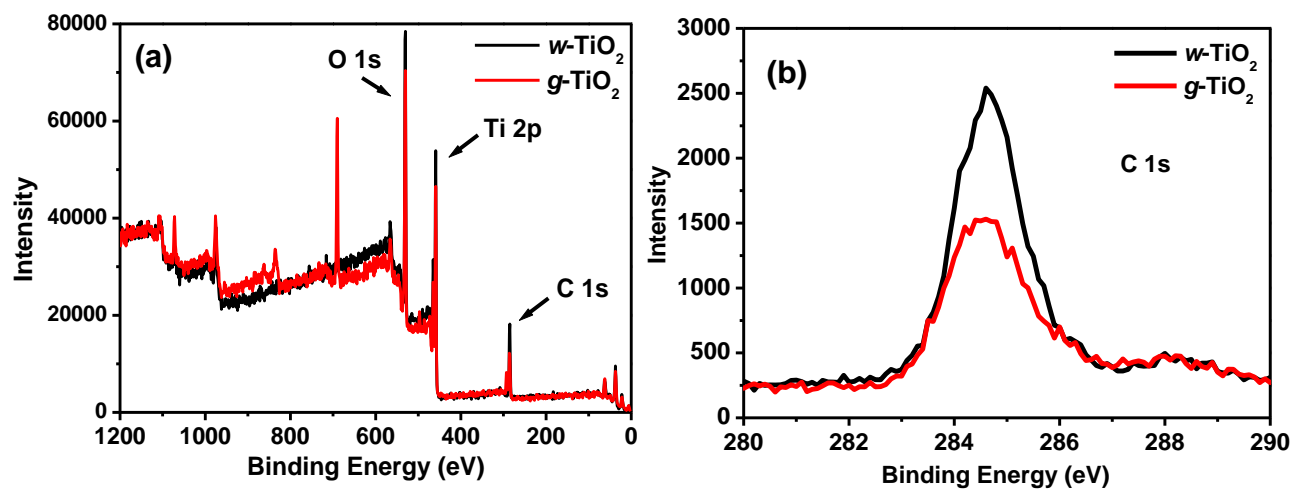

**Fig. S5** XPS survey spectra of the *w*-TiO<sub>2</sub> and *g*-TiO<sub>2</sub> nanoparticles.
